# Supplementary material for: Wide Fontanels, Delayed Speech Development and Hoarse Voice as Useful Signs in the Diagnosis of KBG Syndrome: A Clinical Description of 23 Cases with Pathogenic Variants Involving the ANKRD11 Gene or Submicroscopic Chromosomal Rearrangements of 16q24.3
Source: MDPI journal article supplement (doi:10.3390/genes12081257), 2021-08-17
Supplement: s1 [file s1]

**Table S1.** Summary of panels used and quality data for patients examined with next-generation sequencing. Samples that were processed with custom panels were sequenced at 2x75 cycles.

| Patient | Identified Variant                    | Name of the Panel                    | Allele Depth/Overall Depth of Coverage for the Variant | Instrument          | Mean Coverage | % of Sequences Covered At Least 20x |
|---------|---------------------------------------|--------------------------------------|--------------------------------------------------------|---------------------|---------------|-------------------------------------|
| 1       | c.1903_1907del (p.Lys635Glnfs*26)     | SS_CRANIO_V2                         | 190/414                                                | NextSeq550          | 340x          | 99.8%                               |
| 2       | c.1903_1907del (p.Lys635Glnfs*26)     | CRANIO_OG                            | 47/129                                                 | MiSeq               | 119.9x        | 99.5%                               |
| 3       | c.7607G>A<br>(p.Arg2538Gln)           | CRANIO_OG                            | 69/133                                                 | MiSeq               | 106.3x        | 99.3%                               |
| 4       | c.4558del<br>(p.Asp1520Thrfs*11)      | RASGENODERM_V3                       | 120/245                                                | MiSeq               | 197.7x        | 99.8%                               |
| 5       | c.2395A>T<br>(p.Lys799Ter)            | RASGENODERM_V3                       | 150/319                                                | MiSeq               | 203.1x        | 99.8x                               |
| 6       | c.1389dup<br>(p.Gly464Argfs*29)       | SS_CRANIO_V1                         | 217/419                                                | NextSeq550          | 279.0x        | 99.9%                               |
| 7       | c.7552C>T<br>(p.Gln2518Ter)           | SS_CRANIO_V1                         | 100/187                                                | NextSeq550          | 279.0x        | 99.8%                               |
| 8       | c.2828_2829del (p.Glu943Valfs*74)     | SS_CRANIO_V1                         | 63/131                                                 | NextSeq550          | 89x           | 96.4%                               |
| 9       | c.6340C>T<br>(p.Gln2114Ter)           | Illumina CEX                         | 57/100                                                 | HiSeq1500 (2x100)   | 86.7x         | 97.3%                               |
| 10      | c.3295_3296del (p.Phe1099Leufs*2)     | Exome (CeGaT, Twist Core Exome Plus) | 63/124                                                 | NovaSeq6000 (2x100) | 140x          | 99.4%                               |
| 11      | c.3771dup<br>(p.Glu1258Argfs*25)      | RASGENODERM_V3                       | 120/245                                                | MiSeq               | 145.1x        | 99.5%                               |
| 12      | c.1385_1388del<br>(p.Thr462Lysfs*47)  | SS_CRANIO_V1                         | 145/190                                                | NextSeq550          | 175.0x        | 98.7%                               |
| 13      | c.6053_6057del<br>(p.Pro2018Argfs*12) | RASGENODERM_V3                       | 40/79                                                  | MiSeq               | 147.3x        | 99.7%                               |
